# Supplementary material
Source: Springer Nature journal article supplement (https://www.springermedizin.de/resource/supplementary/12874_2006_173_MOESM3_ESM.pdf/9433924)

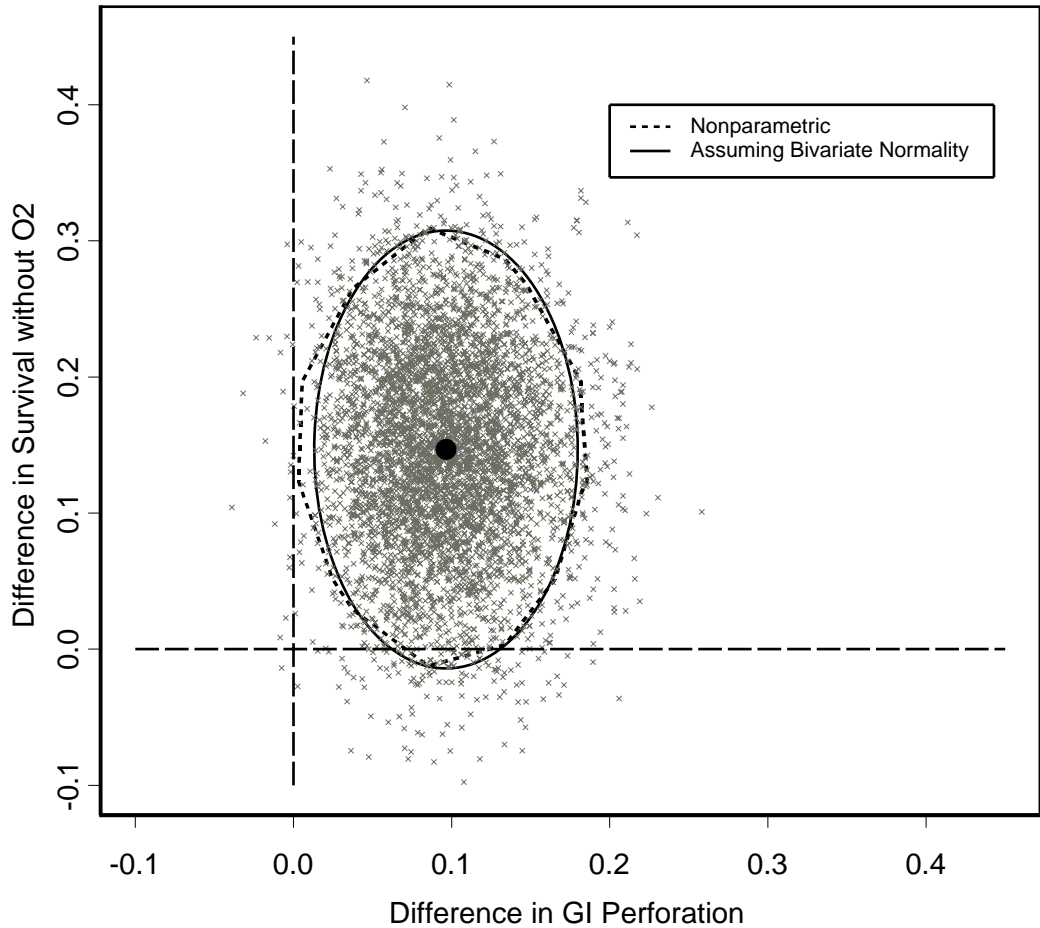

Supplement: MOESM3 [file 9433924]
